# Supplementary material for: Towards a lattice-matching solid-state battery: synthesis of a new class of lithium-ion conductors with the spinel structure
Source: Royal Society of Chemistry journal article supplement (doi:10.1039/c3cp50803j), 2013-01-01

Electronic supplementary information to manuscript ID EE-ART-01-2013-040127

"Towards a lattice-matching solid state battery: a new class of lithium-ion conductors with the spinel structure"

- Potentiodynamic scan of Mg005
- High-Throughput XRD patterns for  $\text{Li}_x\text{Mg}_{1-2x}\text{Al}_{2+x}\text{O}_4$
- Neutron Powder Diffraction patterns for Mg005, Mg015, Zn005 and Zn015
- $^{27}\text{Al}$ -NMR spectra for Mg005 and Mg025

Figure S1: Potentiodynamic scan of Mg005 pellet between 0 and 10V vs.  $\text{Li}^+/\text{Li}$ . The flat current profile shows no decomposition of the material and that there is negligible electronic conductivity.

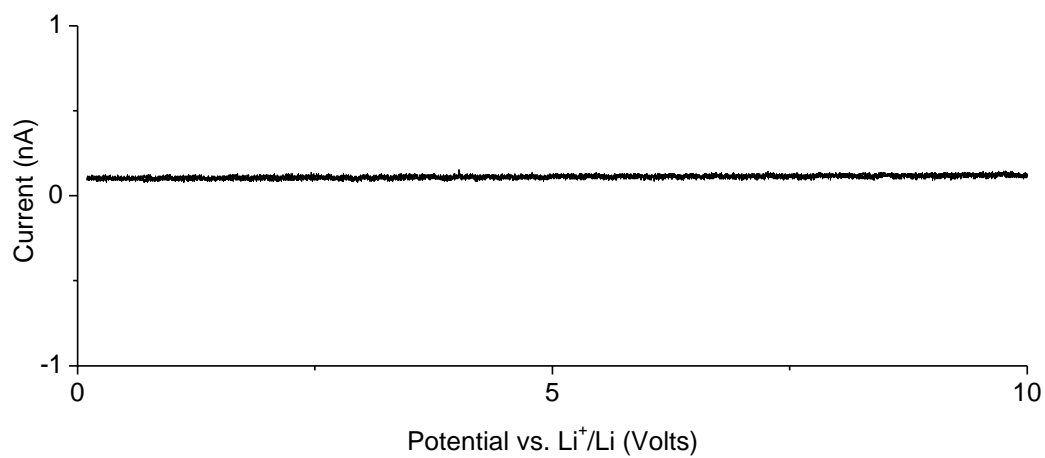

Figure S2: Comparison of XRD patterns for  $\text{Li}_x\text{Mg}_{1-2x}\text{Al}_{2+x}\text{O}_4$

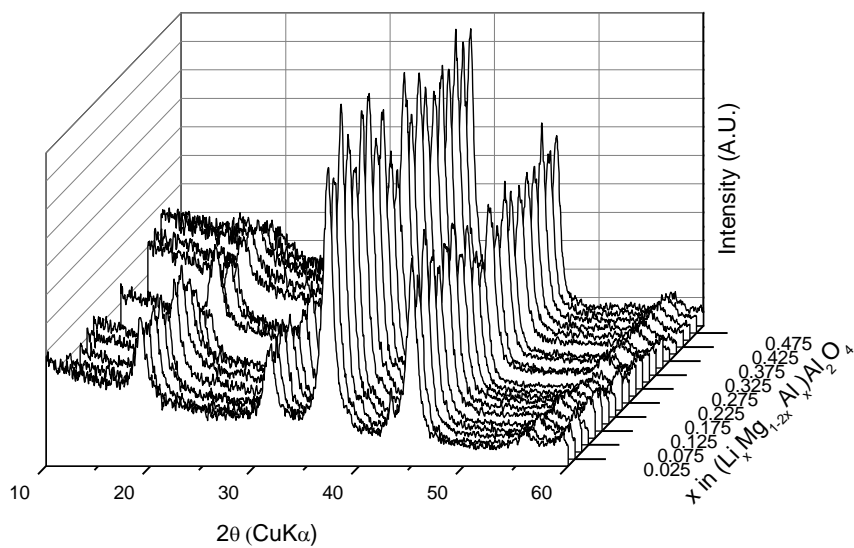

Figure S3: Neutron Powder Diffraction pattern for Mg005

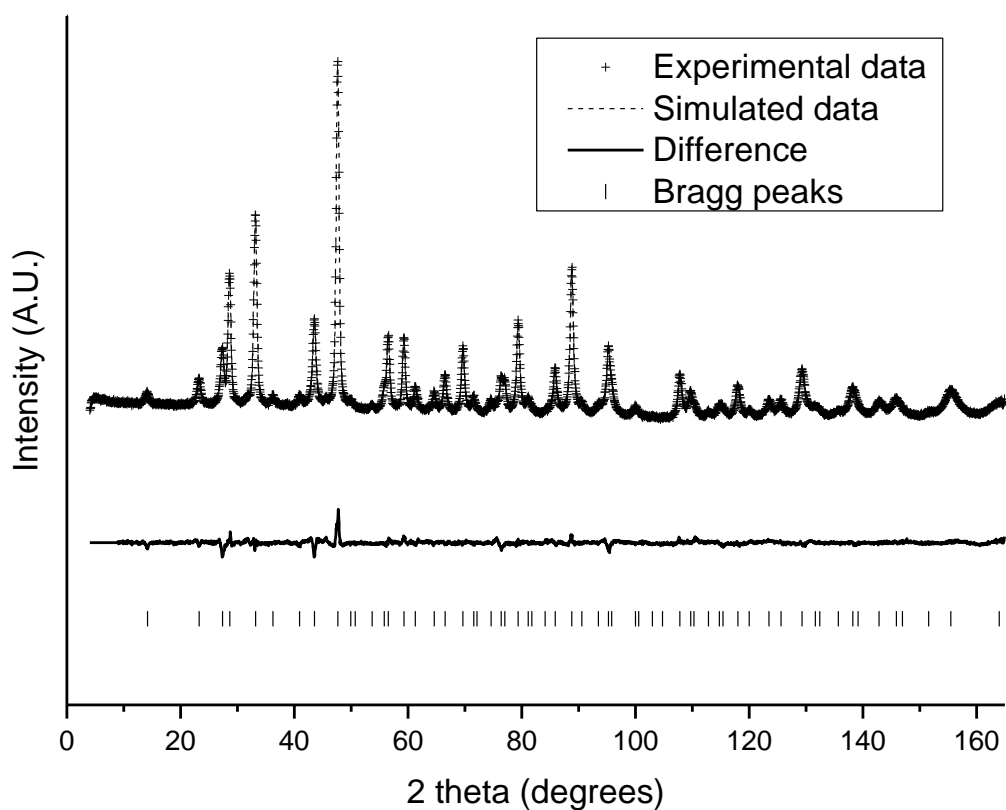

Figure S4: Neutron Powder Diffraction pattern for Mg015

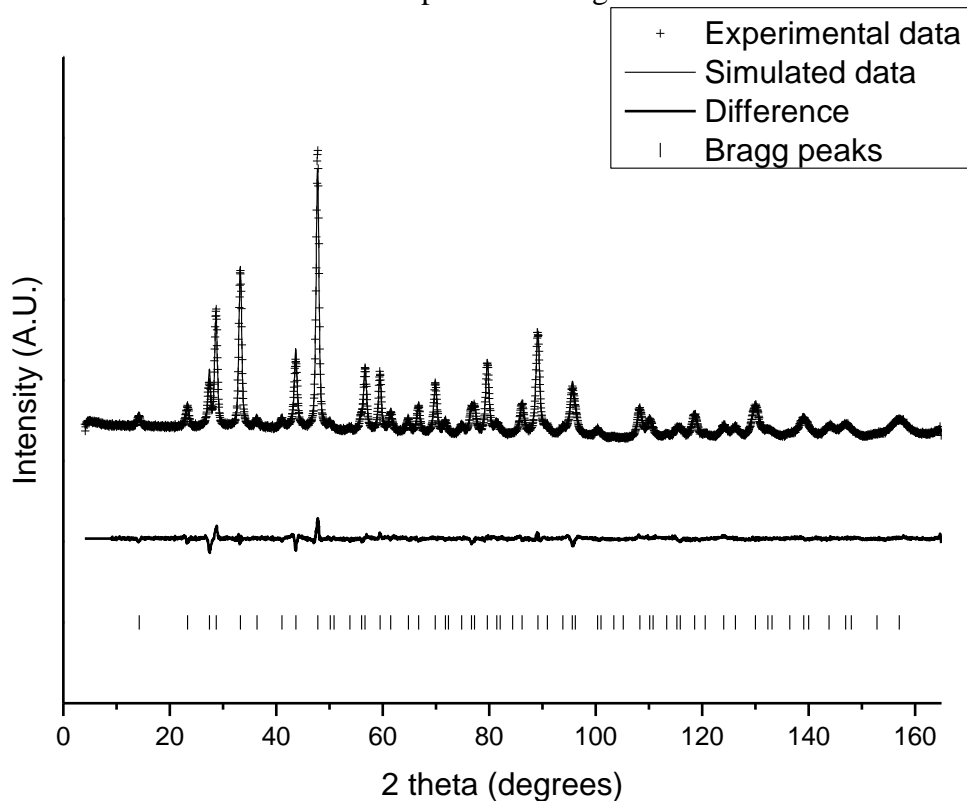

Figure S5: Neutron Powder Diffraction pattern for Zn005

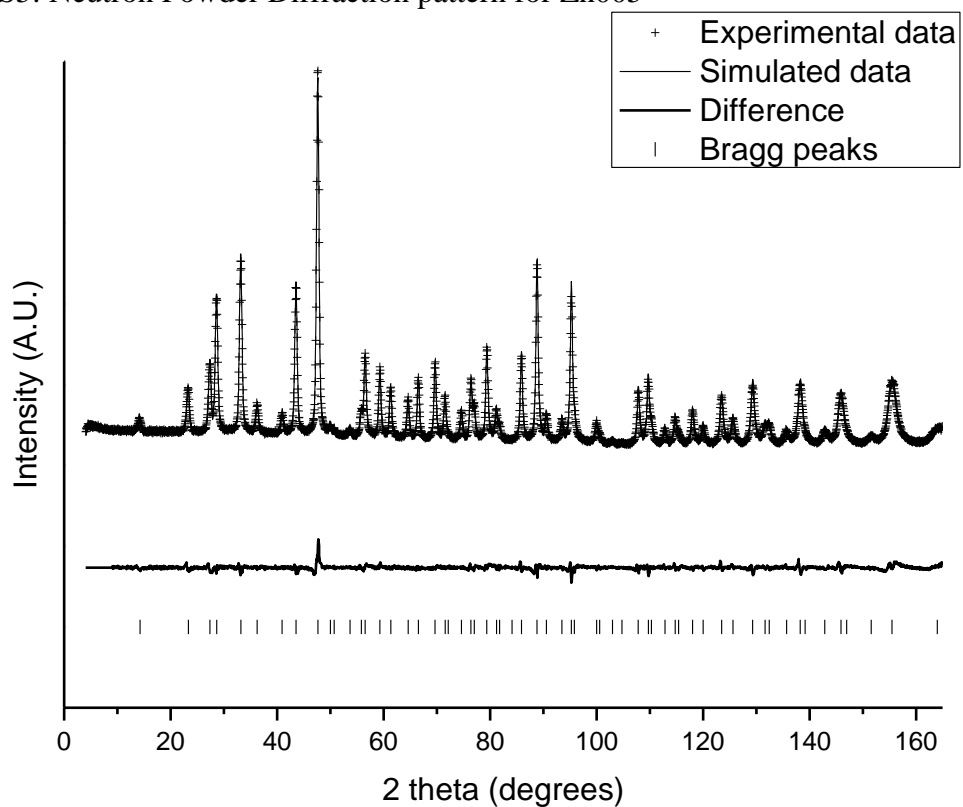

Figure S6: Neutron Powder Diffraction pattern for Zn015

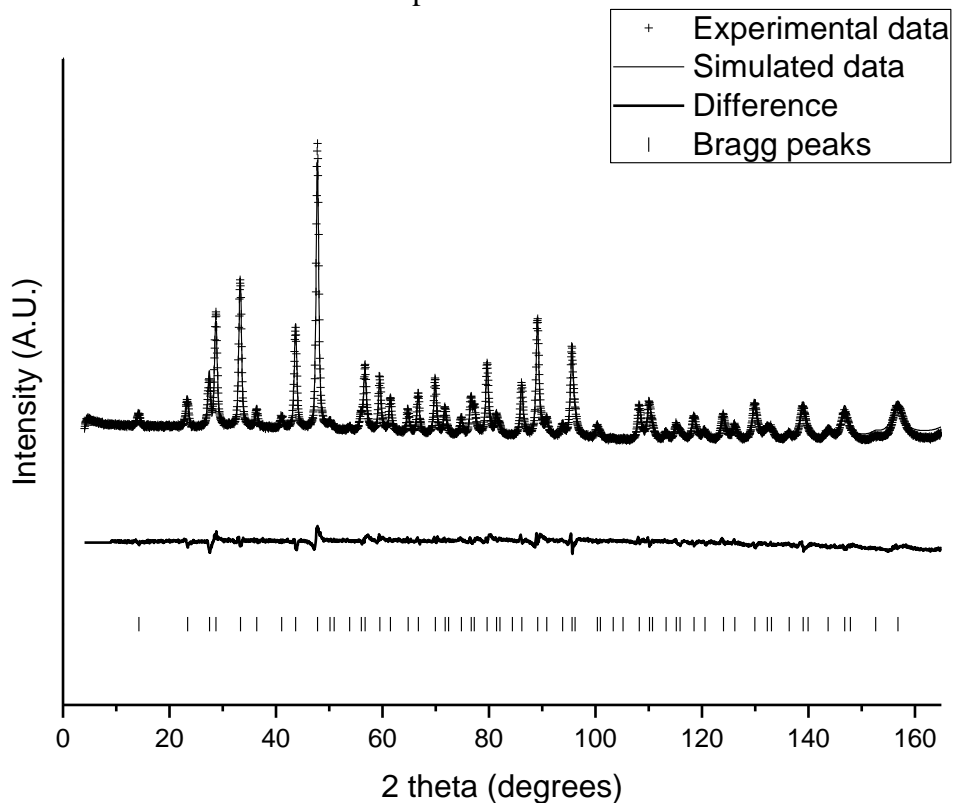

Figure S7:  $^{27}\text{Al}$ -NMR spectra for Mg005 and Mg025

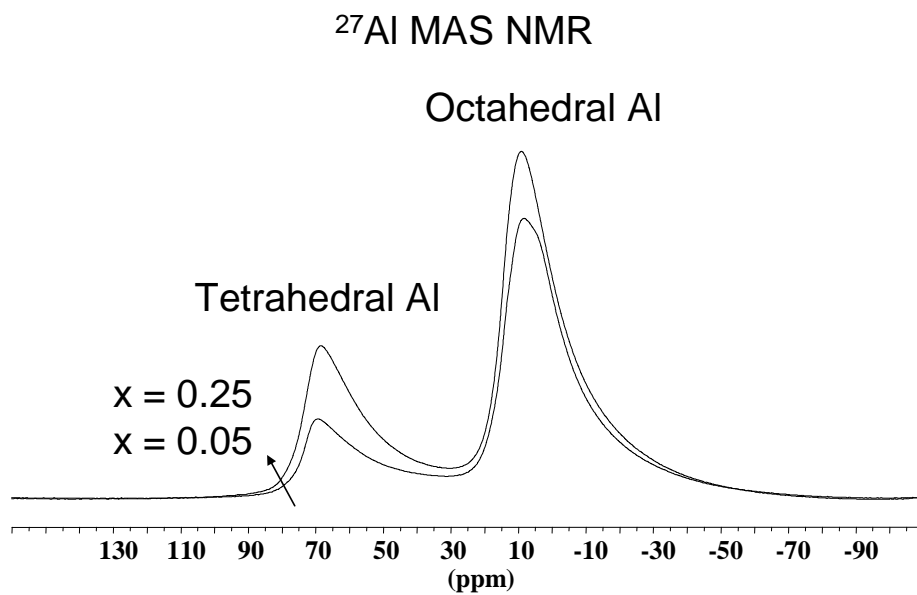

Supplement: c3cp50803j.pdf [file c3cp50803j.pdf]
